# Supplementary material
Source: publisher site journal article supplement (https://www.dovepress.com/article/281865)
Supplement: Supplementary file 1 [file get_supplementary_file.php]

**Supplementary Table S1.** Demographics, baseline and clinical characteristics stratified by 90-day death in the overall cohort

|  | Death  (n = 67) | Non-death  (n = 195) | P value | Odds ratio  (95% CI) | Pvalue |
| --- | --- | --- | --- | --- | --- |
| Age, mean (SD), y | 71.4 (10.5) | 67.1 (11.8) | 0.008 |  |  |
| Male, n (%) | 38 (56.7) | 104 (53.3) | 0.632 |  |  |
| Medical history, n (%) |  |  |  |  |  |
| Hypertension | 55 (82.1) | 128 (65.6) | 0.011 |  |  |
| Diabetes mellitus | 14 (20.9) | 29 (14.9) | 0.251 |  |  |
| Clinical characteristics, median (IQR) |  |  |  |  |  |
| Baseline NIHSS score | 16 (15-20) | 15 (12-19) | 0.001 |  |  |
| Baseline ASPECT score | 8 (7-8) | 9 (8-10) | <0.001 | 0.375 (0.235-0.597) | <0.001 |
| Stroke cause, n (%) |  |  |  |  |  |
| LAA | 15 (22.4) | 71 (36.4) | 0.018 |  |  |
| Cardioembolic | 47 (70.1) | 98 (50.3) |  |  |  |
| Undetermined or other | 5 (7.5) | 26 (13.3) |  |  |  |
| Occlusion site, n (%) |  |  |  |  |  |
| ICA | 35 (52.2) | 77 (39.5) | 0.069 |  |  |
| MCA | 32 (47.8) | 118 (60.5) |  |  |  |
| OTP, median (IQR) | 250 (200-300) | 260 (220-300) | 0.140 |  |  |
| Bridging therapy, n (%) | 6 (9.0) | 27 (13.8) | 0.298 |  |  |
| Collateral score, n (%) |  |  |  |  |  |
| Grade 0 | 34 (50.7) | 27 (13.8) | <0.001 | Reference |  |
| Grade 1 | 18 (26.9) | 82 (42.1) |  | 0.189 (0.063-0.562) | 0.003 |
| Grade 2 | 15 (22.4) | 86 (44.1) |  | Reference |  |
| mTICI, 2b/3, n (%) | 37 (55.2) | 154 (79.0) | <0.001 | 0.212 (0.079-0.572) | 0.002 |
| SIRS, n (%) | 55 (82.1) | 37 (19.0) | <0.001 | 25.336 (8.578-74.835) | <0.001 |
| Laboratory examination | |  |  |  |  |
| FBG* (mmol/L), mean (SD) | 9.6 (4.2) | 6.6 (2.8) | <0.001 | 1.188 (1.056-1.336) | 0.004 |
| Leucocytes, 109/L | 13.3 (10.5-17.7) | 9.7 (8.0-12.2) | <0.001 |  |  |
| [Neutrophils](javascript:;),109/L | 11.8 (8.9-15.6) | 8.1 (6.6-10.4) | <0.001 |  |  |
| Lymphocytes, 109/L | 0.7 (0.5-1.0) | 1.0 (0.7-1.4) | <0.001 | 0.296 (0.106-0.824) | 0.020 |

*SIRS*, Systemic inflammatory response syndrome; *ASPECT,* Alberta Stroke Program Early CT; *ICA*, internal carotid artery; *LAA,* large-artery atherosclerosis; *mTIC*I, modified thrombolysis in cerebral infarction; *ICA*, [internal](javascript:;) [carotid](javascript:;) artery; *MCA*, middle cerebral artery; *NIHSS*, National Institutes of Health Stroke Scale; *OTP*, symptom onset to groin puncture time; *FBG*, fasting blood glucose

*Missing data in six patients.

**Supplementary Table S2.** Comparison of Non-SIRS with SIRS in the propensity score-matched subgroups of patients

|  | PSM sample | | |
| --- | --- | --- | --- |
|  | Non-SIRS  (n = 67) | SIRS  (n = 67) | P value |
|  |
| Age, mean (SD), y | 67.8 (11.5) | 68.5 (11.7) | 0.721 |
| Male, n (%) | 38 (56.7) | 39 (58.2) | 0.861 |
| Hypertension | 55 (82.1) | 52 (77.6) | 0.518 |
| Diabetes mellitus | 13 (19.4) | 13 (19.4) | 1.000 |
| Atrial fibrillation | 34 (50.7) | 34 (50.7) | 1.000 |
| Clinical characteristics, median (IQR) |  |  |  |
| Baseline NIHSS score | 16 (14-20) | 17 (14-19) | 0.791 |
| Baseline ASPECT score | 8 (8-10) | 8 (8-9) | 0.448 |
| Stroke cause, n (%) |  |  |  |
| LAA | 21 (31.3) | 20 (29.9) | 0.851 |
| Cardioembolic | 40 (59.7) | 39 (58.2) |
| Undetermined or other | 6 (9.0) | 8 (11.9) |
| Occlusion site, n (%) |  |  |  |
| ICA | 27 (40.3) | 27(40.3) | 1.000 |
| MCA | 40 (59.7) | 40 (59.7) |
| OTP, median (IQR) | 240(180-300) | 250 (210-300) | 0.799 |
| Collateral score, n (%) |  |  |  |
| Grade 0 | 19 (28.4) | 23 (34.3) | 0.422 |
| Grade1 | 32 (47.8) | 26 (38.8) |
| Grade 2 | 16 (23.9) | 18 (26.9) |
| mTICI, 2b/3, n (%) | 53 (79.1) | 46 (68.7) | 0.169 |
| Independence at 90 days, n (%) | 30 (44.8) | 12 (17.9) | <0.001 |
| Mortality at 90 days, n (%) | 5 (7.5) | 38 (56.7) | <0.001 |
| Laboratory examination |  |  |  |
| FBG* (mmol/L), mean (SD) | 6.9 (2.7) | 8.6 (4.6) | 0.009 |
| Leucocytes, 109/L | 10.1 (8.3-13.3) | 13.1 (10.5-16.9) | <0.001 |
| Neutrophils,109/L | 8.3 (6.6-9.8) | 11.5 (9.3-14.9) | <0.001 |
| Lymphocytes, 109/L | 0.9 (0.6-1.3) | 0.8 (0.6-1.2) | 0.215 |

*SIRS*, Systemic inflammatory response syndrome; *ASPECT*, Alberta Stroke Program Early CT; *ICA,* internal carotid artery; *LAA,* large-artery atherosclerosis; *mTICI,* modified thrombolysis in cerebral infarction; *ICA,* [internal](javascript:;) [carotid](javascript:;) artery; *MCA,* middle cerebral artery; *NIHSS,* National Institutes of Health Stroke Scale; *OTP,* symptom onset to groin puncture time; *FBG,* fasting blood glucose

*Missing data in six patients.

**Supplementary Table S3.** Comparison of direct EVT with bridging therapy in the propensity score-matched subgroups of patients

|  | Overall sample | | | PSM sample | | |
| --- | --- | --- | --- | --- | --- | --- |
|  | Direct EVT  (n = 224) | Bridging therapy  (n = 32) | P value | Direct EVT  (n = 30) | Bridging therapy  (n = 30) | P value |
|  |
| Age, mean (SD), y | 68.0 (11.7) | 68.8 (11.7) | 0.731 | 68.4 (9.9) | 68.8 (11.5) | 0.886 |
| Male, n (%) | 126 (56.3) | 13 (40.6) | 0.097 | 13 (43.3) | 13 (43.3) | 1.000 |
| Hypertension | 157 (70.1) | 23 (71.9) | 0.836 | 22 (73.3) | 21 (70.0) | 0.774 |
| Diabetes mellitus | 39 (17.4) | 4 (12.5) | 0.487 | 2 (6.7) | 4 (13.3) | 0.389 |
| Atrial fibrillation | 112 (50.0) | 16 (50.0) | 1.000 | 18 (60.0) | 15 (50.0) | 0.439 |
| Clinical characteristics, median (IQR) |  |  |  |  |  |  |
| Baseline NIHSS score | 16 (13-19) | 15 (12-19) | 0.408 | 16 (14-19) | 16 (12-19) | 0.310 |
| Baseline ASPECT score | 8 (8-10) | 9 (8-10) | 0.518 | 9 (8-10) | 9 (8-10) | 0.842 |
| Stroke cause, n (%) |  |  |  |  |  |  |
| LAA | 72 (32.1) | 12 (37.5) | 0.524 | 9 (30.0) | 11 (36.7) | 0.964 |
| Cardioembolic | 123 (54.9) | 18 (56.3) | 19 (63.3) | 17 (56.7) |
| Undetermined or other | 29 (12.9) | 2 (6.3) | 2 (6.7) | 2 (6.6) |
| Occlusion site, n (%) |  |  |  |  |  |  |
| ICA | 94 (42.0) | 13 (40.6) | 0.886 | 13 (43.3) | 13 (43.3) | 1.000 |
| MCA | 130 (58.0) | 19 (59.4) | 17 (56.7) | 17 (56.7) |
| OTP, median (IQR) | 259(210-300) | 298 (213-328) | 0.103 | 270 (240-360) | 298 (210-323) | 0.615 |
| Collateral score, n (%) |  |  |  |  |  |  |
| Grade 0 | 48 (21.4) | 10 (31.3) | 0.422 | 8 (26.7) | 9 (30.0) | 0.371 |
| Grade1 | 89 (39.7) | 10 (31.3) | 6 (20.0) | 10 (33.3) |
| Grade 2 | 87 (38.8) | 12 (37.5) | 16 (53.3) | 11 (36.7) |
| mTICI, 2b/3, n (%) | 163 (72.8) | 24 (75.0) | 0.790 | 25 (83.3) | 23 (76.7) | 0.519 |
| Independence at 90 days, n (%) | 97 (43.3) | 16 (50.0) | 0.475 | 15 (50.0) | 15 (50.0) | 1.000 |
| Mortality at 90 days, n (%) | 58 (25.9) | 6 (18.8) | 0.383 | 6 (20) | 6 (20) | 1.000 |
| Laboratory examination |  |  |  |  |  |  |
| FBG* (mmol/L), mean (SD) | 7.3 (3.4) | 7.6 (3.9) | 0.708 | 6.7 (2.2) | 7.6 (4.1) | 0.275 |
| Leucocytes, 109/L | 10.1 (8.3-13.3) | 10.5 (8.5-13.8) | 0.640 | 9.5 (8.2-13.2) | 10.3 (8.4-14.4) | 0.524 |
| Neutrophils,109/L | 8.7 (6.8-11.7) | 9.4 (6.8-11.4) | 0.659 | 7.9 (6.9-11.7) | 9.1 (6.7-11.8) | 0.584 |
| Lymphocytes, 109/L | 0.9 (0.7-1.3) | 1.0 (0.7-1.4) | 0.356 | 0.8 (0.7-1.1) | 1.1 (0.7-1.4) | 0.448 |
| SIRS, n (%) | 82 (36.6) | 9 (28.1) | 0.348 | 11 (36.7) | 8 (26.7) | 0.405 |

*SIRS*, Systemic inflammatory response syndrome; *ASPECT*, Alberta Stroke Program Early CT; *ICA,* internal carotid artery; *LAA,* large-artery atherosclerosis; *mTICI,* modified thrombolysis in cerebral infarction; *ICA,* [internal](javascript:;) [carotid](javascript:;) artery; *MCA,* middle cerebral artery; *NIHSS,* National Institutes of Health Stroke Scale; *OTP,* symptom onset to groin puncture time; *FBG,* fasting blood glucose

*Missing data in six patients.
